# Supplementary material for: Profiling the repertoire of phenotypes influenced by environmental cues that occur during asexual reproduction
Source: HighWire-hosted journal article supplement (doi:10.1101/gr.091611.109), 2009-07-27
Supplement: Fig.S2.pdf [file Fig.S2.pdf]

**Fig. S2 Bisulfite sequencing of the M17C fragment**

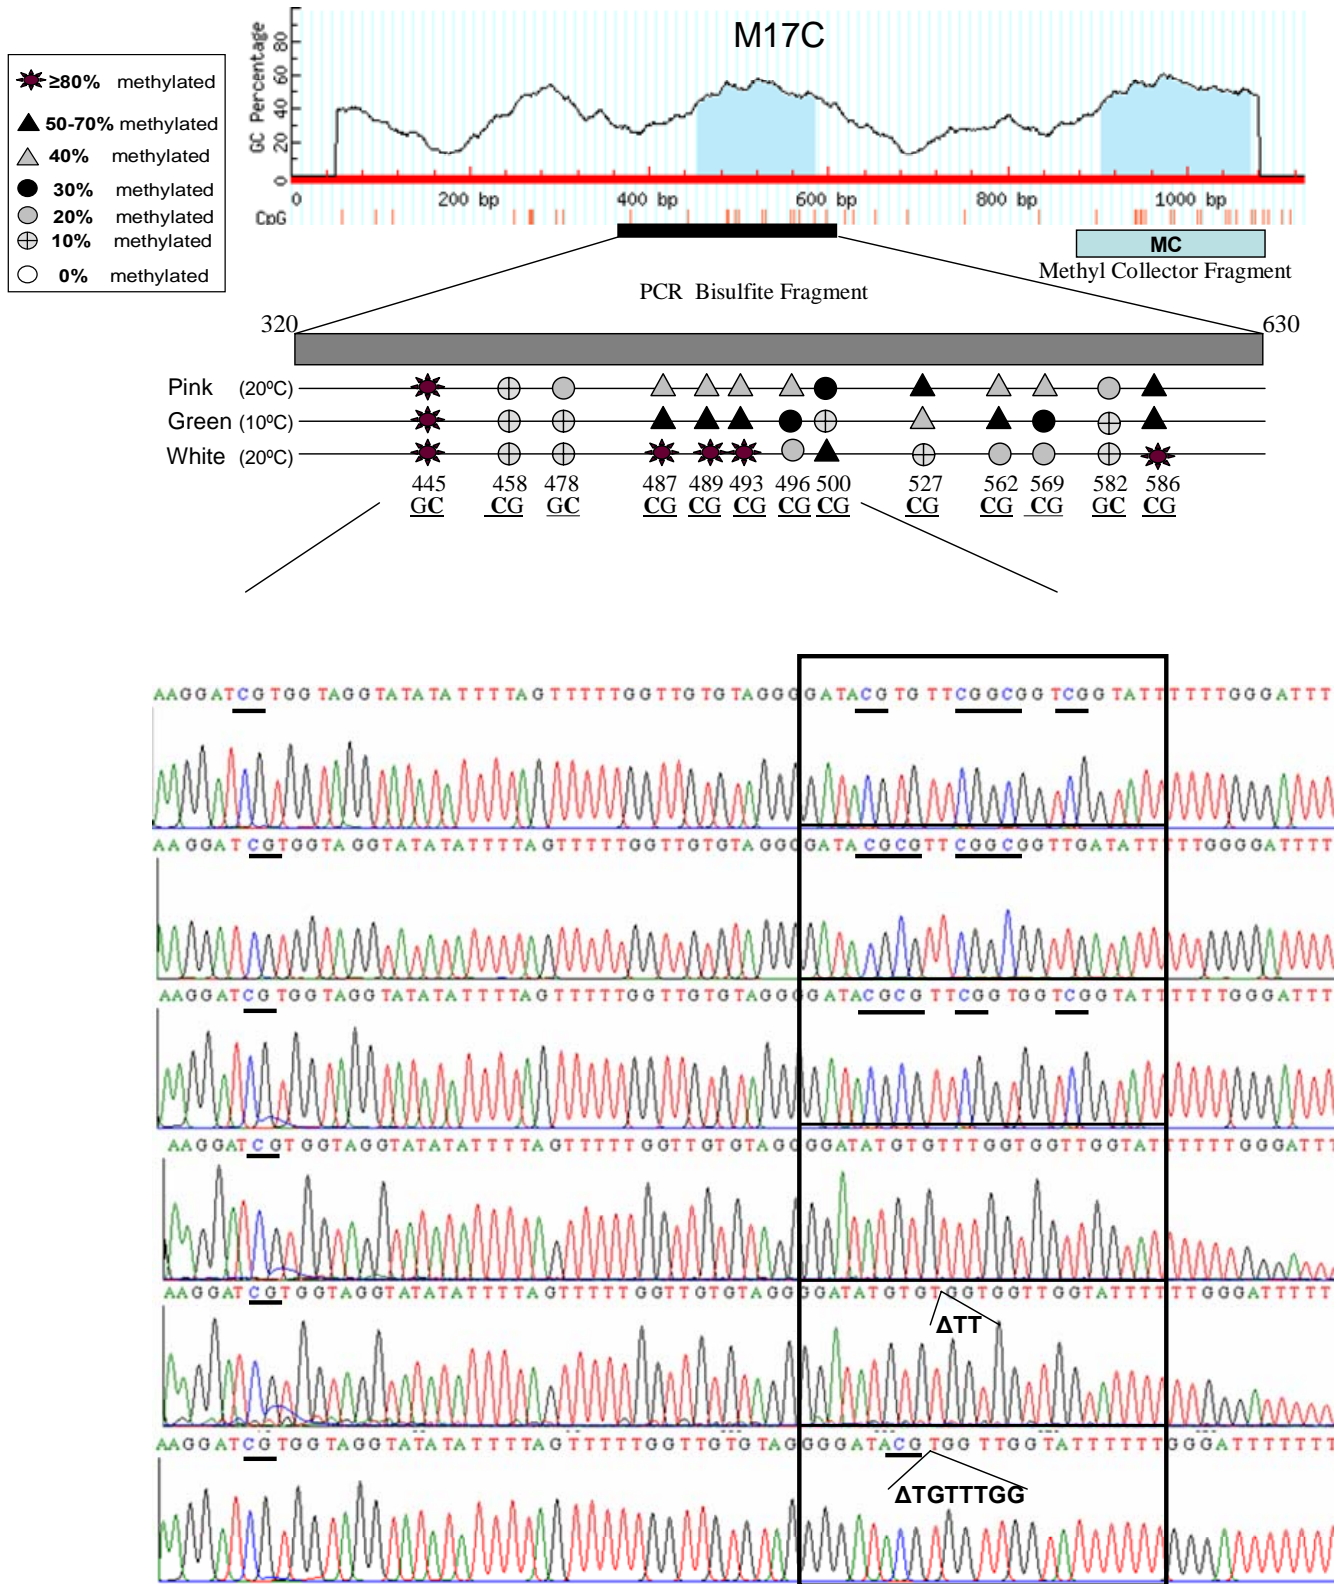

**Figure S2.** Bisulfite sequencing of the extended region of the affinity precipitated M17C fragment gi|171824612: 8609-8756 Contig21050. Prediction of the CpG Island and primers designed for the bisulfite sequencing was performed by the MethPrimer program <http://www.urogene.org/methprimer/index1.html>. Quantification of the methylation percentage was calculated by direct bisulfite sequencing of 20 independent clones.
