# Supplementary material for: Profiling the repertoire of phenotypes influenced by environmental cues that occur during asexual reproduction
Source: HighWire-hosted journal article supplement (doi:10.1101/gr.091611.109), 2009-07-27
Supplement: Fig.S4.pdf [file Fig.S4.pdf]

**Fig. S4 Bisulfite sequencing for B19 fragment**

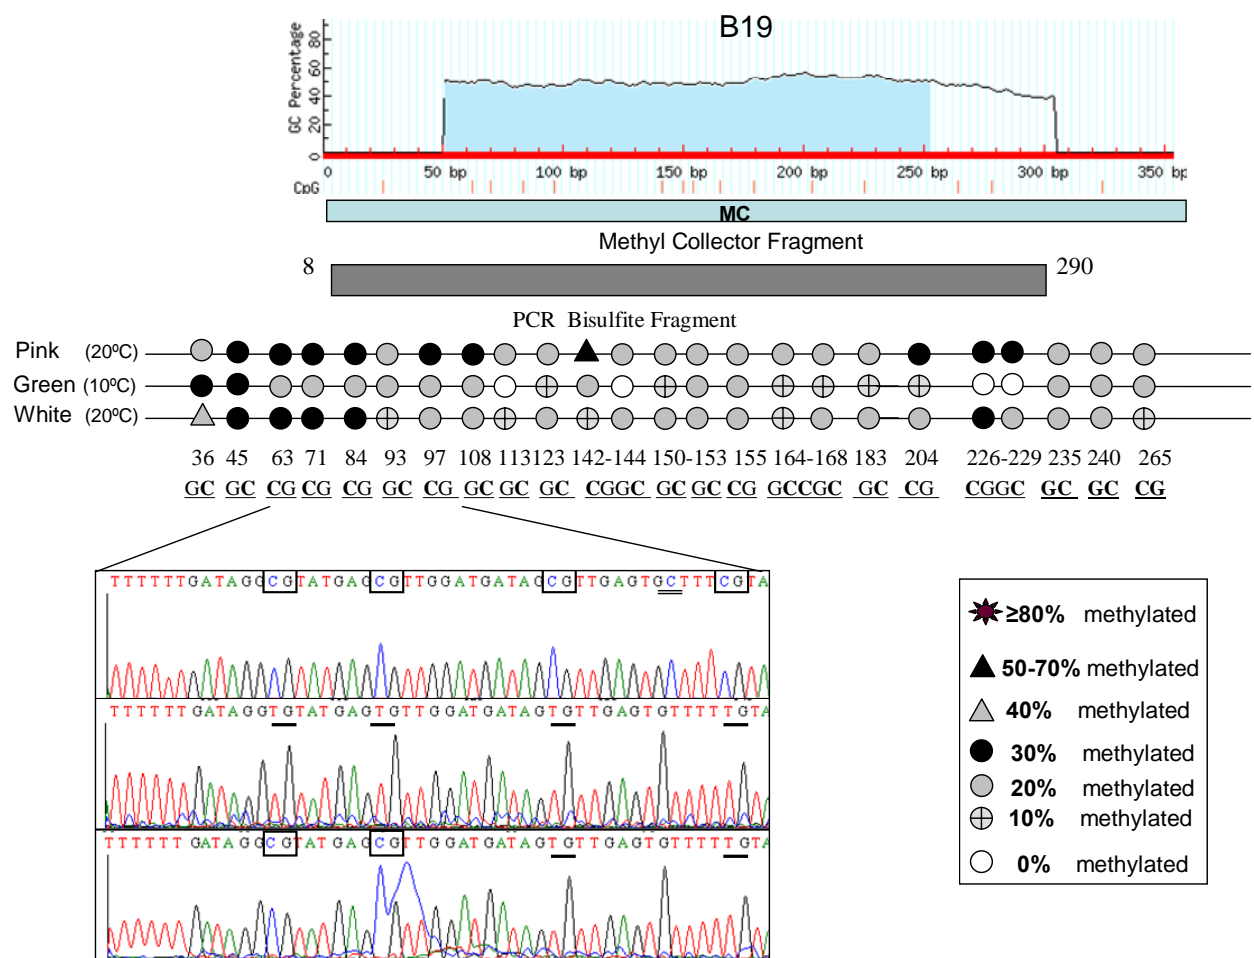

**Figure S4.** Bisulfite sequencing of the affinity precipitated B19 fragment

Prediction of the CpG Island and the design of primers for bisulfite sequencing were performed using the MethPrimer program <http://www.urogene.org/methprimer/index1.html>. Quantification of the methylation percentage was calculated by direct bisulfite sequencing of 10 independent clones.
