# Supplementary material for: Profiling the repertoire of phenotypes influenced by environmental cues that occur during asexual reproduction
Source: HighWire-hosted journal article supplement (doi:10.1101/gr.091611.109), 2009-07-27
Supplement: Fig.S5.pdf [file Fig.S5.pdf]

**Fig. S5. Bisulfite sequencing of selected regions within cuticular protein genes**

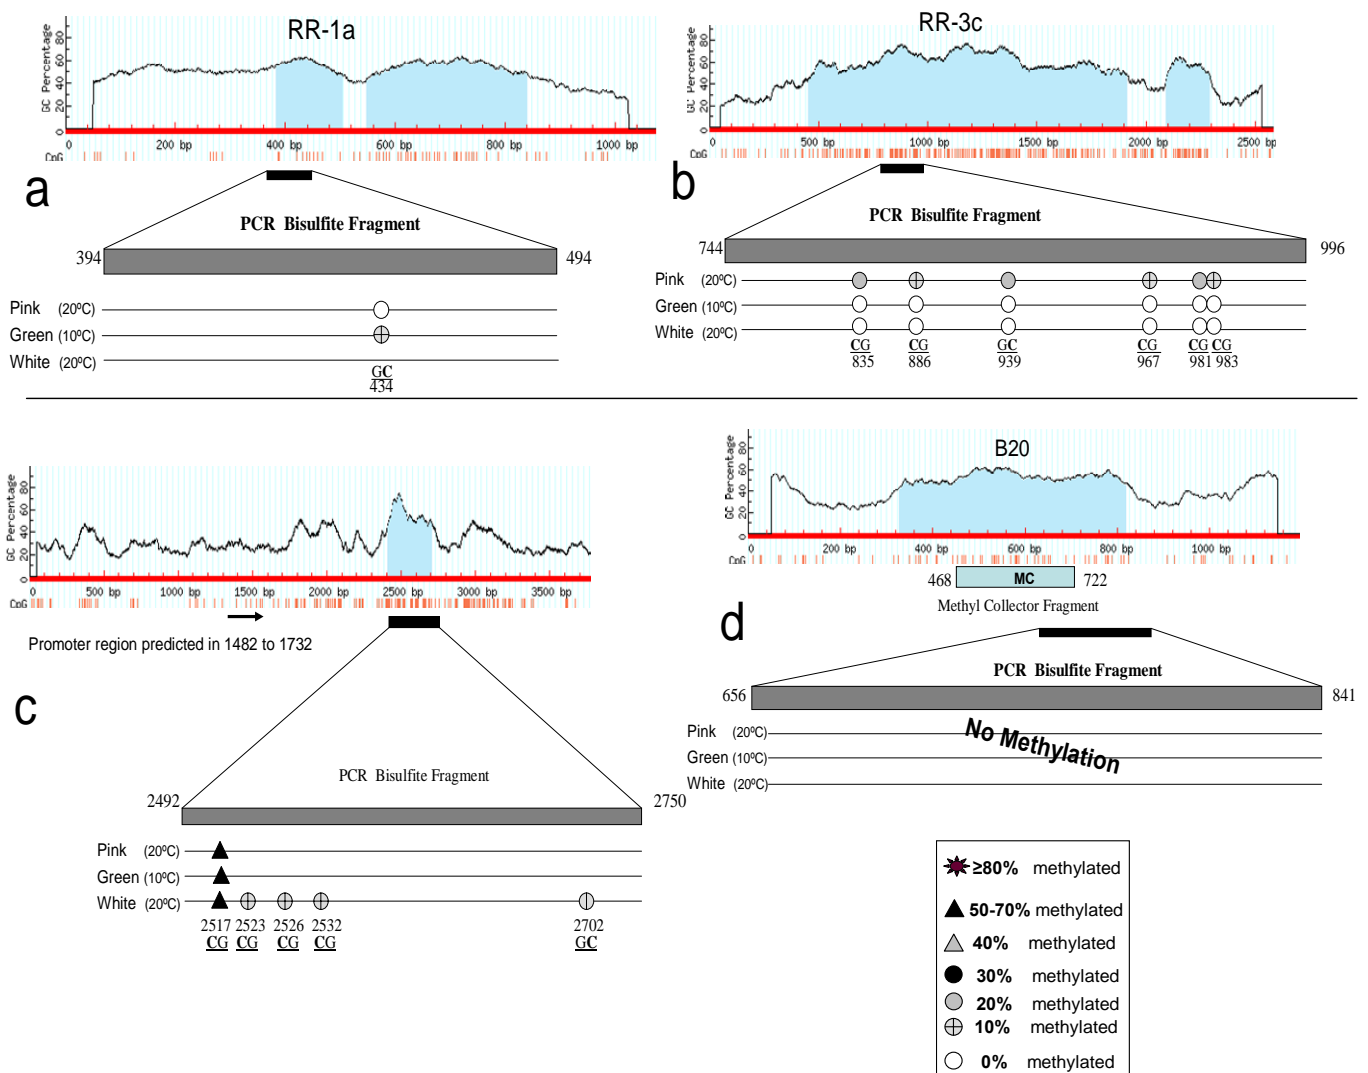

**Figure S5. Bisulfite sequencing of fragments showing low levels of methylation**

Prediction of the CpG Island and the design of primers for bisulfite sequencing were performed using the MethPrimer program <http://www.urogene.org/methprimer/index1.html>. Quantification of the methylation percentage was calculated by direct bisulfite sequencing of 10 independent clones. (a), an RR-1 cuticular protein gene located at gi|171829605: position 22358-22862 Contig16053. (b), an RR-3 cuticular protein gene located at gi|171829029:61577-62329 Contig16630. (c), a promoter prediction of the reverse complementary sequence of the region between 18611 and 22481 at gi|171845529|gb|ABLF01000124.1 The promoter region was predicted using the WWW Promoter Scan program <http://www-bimas.cit.nih.gov/molbio/proscan/> [The promoter was identified on the forward strand from 1482 to 1732, the Promoter Score was 62.10 (Promoter Cutoff = 53.000000) and a TATA motif was found at 1710, Est.TSS = 1740]. (d), the affinity precipitated B19 fragment was found to be unmethylated.
